# Supplementary material
Source: PubMed Central journal article supplement (PMC3426128)
Supplement: supp_tpc.112.098947_tpc098947Supplemental.pdf [file supp_tpc.112.098947_tpc098947Supplemental.pdf]

**Supplemental Figure 2.** Fluorescence Excitation and Emission of the aCRY Chromophore before and after Acidification.

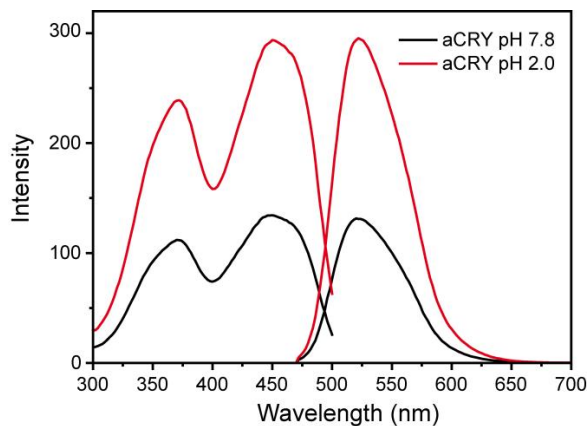

To reveal the identity of the flavin chromophore, heterologously expressed aCRY with  $OD_{447} = 0.5$  was denatured by heat (10 min,  $95^{\circ}\text{C}$ ). The denatured protein was pelleted by centrifugation for  $2 \times 10$  min at 15,000 g. Emission spectra with excitation at 447 nm and excitation spectra with emission at 520 nm were taken of the supernatant. Upon acidification with 50 mM phosphoric acid to a pH of 2.0, an increase of fluorescence typical of FAD was detected. This rise has been attributed to a loss of interaction between the adenine and flavin ring systems upon protonation of the adenine ring.

**Supplemental Figure 3.** Sequences in *acry* Mutant Strains and Primers for Characterization

**(A)** Position of the *APHVIII* insertion in the *acry* mutant

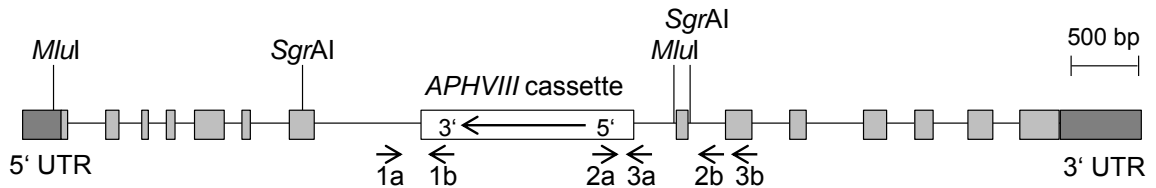

The position of the *APHVIII* cassette in the *acry* mutant is shown. Boxes in light gray depict exons, black lines introns. Boxes in dark gray show the 5'- and 3'-UTRs, respectively. The *APHVIII* cassette (white box) is inserted in intron 7 in reverse direction relative to *APHVIII*. Arrows show primer-binding sites. Mutant line CRMS101 was identified using primer pair 1a/1b (see Supplemental Figure 3D). DNA regions spanning the borders of the insertion were amplified with primer pairs 1a/1b and 2a/2b, and sequenced (Supplemental Figure 3B and 3D). In the *acry* mutant in an SAG73.72 background (SAG73.72:*acry*1A), the full *APHVIII* cassette was amplified with primer pair 1a/3b and sequenced with primers 1a, 3a and 3b (Supplemental Figure 3C and 3D). The restriction sites that are shown were used to characterize the *acry* mutant by Southern blot analysis.

**Supplemental Figure 3.** continued (2/4)

**(B) Sequenced regions in the *acry* mutant CRMS101**

CGGGCAGTGGTGGCAGCCACCAGACCCCTGCCCCCTACGCCGGAGCCCCAACAGACACGCGACACAACCTAAAGCCACAGCAACCAC  
CGCGCCCGCGGCTCCCAAGTCCACGAGAGCGAAGCCACCAGACGGGGCGGGCAAGAAGCGCCGCCCGCGAACTTTCCATCG  
GCCAGCAACATCCCCGCGCCCTGGTCGGGATGTCGCCGACCTGAGAATTCGATATCTCAGAAGAACTCGTCCAACAGCCGGTA  
AAACGCCAGCTTTTCTCCGATACCGCCCCATCCACCCGCGCCGTACTCCCGCAGGAACGCCGCGGAACACTCCGGCCCGAACC  
ACGGGTCTCTCGTGGGCCAGCTCGCGCAGCACCAGCGGAGATCGGAGTGCCGGTCCCGCACGGCCGACCCGCCCCACGTCGATC  
AGCCCGGTCACTCGCAGGTACGAGGGTCGAGCAGCAGTGTGCCGGCAGAGTGACCGTGGCAAACCGCCAGATCCTCGTCCGC  
AGGCCGAGTCCGCTCCAGCTCGGCGAGAAGCCGCTCCCCCGACCACCCCTTCCGCTCCTCGTCCAGATCCTCCAAGTCCGAGCTCC  
CTTCAGCGACAGCACGGGCCCTGCGGCACCGTCACCGCGAGACTGCGATCGAACGGACACCGCTCCAGTCCAGCGGTGCAGC  
GAACGAGCGAGCCCCGCGAGCCGCCACCGCCACGTCCAGCCGCTGCTCCCGCGGCCACCGCGCACTGGCCGGACGCCCGGAACCGC  
TTCCGGTGACCAACCAGGCGACCTCTCGTCCCCACCACCTCCACAACACGAGGTACGGGAATCCCCACCTCCGCCAACACACCA  
GCCGCTCAGCCTCACCAACAAGCCACCCCGCCCCAGAGCTGCCACCTTGACAAACAACCTCCCGCCACCACCCGAAGCCGA  
TAAACACCAGCCCCGAGGCCCATCTCCACACAACCCACTCACAACCGGGATACCACCCCGCAGTGCACGCAACCGCATCGTC  
CATATGGGCTTGTGTGAGTAGCAGTGGGGTCTAGAAATGCACAACGAGTCAAGAGCGCAACACCTAACCCCTGGCTTGCTCGGGCA  
GGAAACCTCCCCGAGCAAGCCATCTCGGTGCTACCTCCAATTCCAGATCCCCCTCCCGAGCCCGCAGGAGCCCTCGCACGAGT  
GCCGAACGCAACAATATTGATACATAATCGTCCCTGGCTGGGGAAAGGGCCGCTAACGCGCCGGGCGCTCGCGTAAATACCAAT  
AATCACGCCGCTCCACTTTGCTCTCTCGCCTGCAACTTAAAAGCCTACTGCCTCGCCAGATTGCTCCAATTGTGTACAAAT  
GACAATTGCGTCCGAATATGGGGCCGAGCGCTCAGGAAAGGTGGCACTGCGATCTGCTAACATGCTCGGAACGACGACAAGAAG  
CGGCTTTTTAAGGACTCCGAGTTCGGGCAAACATGAGCATTGCTGCCTTCACGCATCGGTAGGTGTGGAGGCGCGCTGGAGAA  
AGGCACCCGAACCTGGCGGCGAGCCCTTCGAACAGCCAGGCCGCTGCTCCGCCCTTCGCTTTCGCATGCGCTTCCAAGCGATCAC  
CAGCACAAAGGGCACCGCTGGCACGAGTACGGGTGTTGAGGCATGCTGAGAGCCCTGGGTCTGTCGGTGGCCTAGGAAGGGCAAA  
AGGGCTGCGGGTTCGGCCGTGAGAGGGAGCGTGGCGGAGACGTGTTTCTGACGAGGGTCTGTGT\*ACGATTGGTCCGCACCGCT  
**GGGCGGTG**\*GCAAGCGAGGCCGCGGCTCCAGAGACCAGGACACCTGGGGCGGGGCGAGCCGGAAGGCTCGCGGGCGGGAACA  
GGAGGGCTTGGTCAATAATACCCTCAACGAAGCGGTGAGAGCTGCTACAGAGAGGCAGAATGCCGAACGGCTGAAGCAGCGAACA  
CAAATGCTTCGGCCGTCTTGTACGGCTCCATGTAACTCCGCTTAGCCTTAATCTCGCTCCGCTCCGCTTCGCTCCGCTACGCT  
CAAACCAGGCTAACCGTAATTTCAATGCACCTTTGCATGCAGCATGCAAGATTCCCTTTGAAGTAACAGATCATGTGTGTACGCG  
TGTGTGTGCATTACAGGTTGGTGTGAGACGGAGGCTCTGGCCAGACTGGAGCGCGGTTCCAAGACCCCAAATGGGTGGCGGGGTTTC  
CAGGTGAGAGGCGAGGCTGGGGCGGTGCACCGGTGTGTGTGTGTGTGTGTGTGTGTGTGTGTGTGTGTGTGTGTGTGTGTGTGT  
GCGATGTTACAACCAATGCCGTGATGGAATGGAGTAAGCTGGCTGGACAGAGTGGACCGGCCGCACTCCCGCGGCAAGCCTATG  
CAGGGTG

Sequenced regions are depicted in black and unsequenced regions in gray. The sequence of the *APHVIII* insertion cassette within the *acry* gene is shown in italics. The *APHVIII* ORF is underlined. The cassette is inserted in the 3' → 5' direction. Nucleotides, which have been incorporated when compared to the theoretical sequence, are marked in bold. One asterisk shows the position of one deleted nucleotide (G). Two asterisks show the position of 11 missing nucleotides (ACGCGGGCCGC) from intron 7 of wild-type *aCRY*, which have been deleted in the mutant.

**Supplemental Figure 3.** continued (3/4)

**(C)** Oligonucleotides used for PCR and sequencing reactions in the *acry* mutant

| <u>Abbreviated name</u> | <u>Original name</u> | <u>Sequence (5' → 3')</u>               |
|-------------------------|----------------------|-----------------------------------------|
| 1a                      | OMM845               | ACAGACACGCGACACAACCTAAAGC               |
| 1b                      | RB2                  | TACCGGCTGTTGGACGAGTTCTTCTG <sup>1</sup> |
| 2a                      | RIM5-2               | GCTGGCACGAGTACGGGTTG                    |
| 2b                      | OMM854               | CCAGCCAGCTTACTCCATTCCATC                |
| 3a                      | OMM1025              | CGAGCCCTCGTCAGAAACAC                    |
| 3b                      | OMM757               | ACTTGAGGTAGGGCGACAGCACAGTGG             |

## Supplemental Figure 3. continued (4/4)

(D) Sequenced regions in the SAG73.72:*acry1A* mutant

ACAGACACGCGACACAACCTAAAGCCACAGCAACCACCGCGCCGCGGCTCCCCAAGTCCACGAGAGCGAAGCCACCAGACGGGGC  
 GGGCAAGAAGCGCCGCGCGCG**GAACTTTCCATCGGGCCAGCAACATCCCCGCGCCCTGGTCGGGATGTCCCGACCTGAGAA**  
**TTTCGATATCTCAGAAGA**ACTCGTCCAACAGCCGGTAAAACGCCAGCTTTTCTCCGATACCGCCCCATCCCACCCGCGCCCGTACT  
CCCGCAGGAACGCGCGGAACTCCGGCCCAACCACGGGTCTCTCGTGGGCCAGCTCGCGCAGCACCAGCGCGAGATCGGAG  
TGGCGGTCCGCACGGCCGACCCGCCACGTTCGATCAGCCGGTACCTCGCAGGTACGAGGGTCGAGCAGCAGTGTGTCGGGCA  
CAGGT**CACCGTGGCAAACGCCAGATCTCTCGTCCGAGGCCGAGTCCGCTCCAGCTCGGCGAGAAGCCGCTCCCCGACCAACCCCT**  
**TCCGCTCCTCGTCCAGATCTCTCAAGTCGACGCTCCCTTCAGCGACAGCACGGGCCCTGCGGCACCGTACC**GTGAGACTGCGA  
TCCGACCGGACACCGCTCCCAAGTCCAGCGGTGCAGCGAACGAGCGGCCCGCGAGCGCCACCGCCAGTCCAGCCGCTGCCG  
CGGCCACGCGCACTGGCCGAGCAGCCCGGAACCGCTTCGGTGACCAACCAGGCGACCTCTCGTCCCCACCACCTCCACAACAC  
GAGGTACGGGAATCCCCACCTCCGCCAACACACCAGCCGCTCAGCCTCACCAACAAGCCACCCCGCCCCAGAGTGCACCC  
TTGACAAACAACTCCCGCCACCAACCCGAAGCCGATAAAACACAGCCCGAGGCCCATCTCCACAACAACCACACTCACAACC  
GGGATACCGACCCCGCAGTGCACGCAACGCATCGTCCATATGGGCTTGTGTGAGTAGCAGTGGGGTCTAGAATGCACAACGAGT  
 CAAGAGCGCAACACCTAACCTGGCTTGTCTCGGCGAGGAAACCTCCCCCGAGCAAGCCATCTCGGTCTACCTCCAATTCACAGA  
 TCCCCCTCCCCAGCCCGCAGGAGCCCTCGCACGAGTGCACGCAACAATATTGATACATAATCGTCCCTGGCCTGGGGGAAGG  
 GCCGCTAACGCGCGGGCGTCCGTAATAACCAATAATCACGCGCGTCCCCTTTGCTCTCTCGCCTTGAACCTAAAGCCCTA  
 CTGCCCTGCCAGATTTGTCCAATTTGTGTACAATGACAATTCGGTCCGAATATGGGGCCGAGCGCGTCAAGAAAGGTGGCACTG  
 CGATCTGCTAACATGTCTCGGAACGACGACAAGAAGCGGCTTTTAAGGACTCCGAGTTGGGGCAACATGAGCAATTTGCTGCC  
 TCACGCATCGGTAGGTGTGGAGGCGCGGTGGAGAAAGGCACCCGAACGGCGCGAGCCCTCGAACAGCCAGGCCCTGCTCC  
 GCCCTTCGTCTTCGCATGCGCTTCCAAGCGATCACCAGCACAAGGGCACCGCTGGCAGGAGTACGGGTTGTTGAGGCATGCTGAG  
 AGCGCTGGGTCTGTGGTGGCTAGGAAAGGGCAAAGGGCTGCGGGTGGCCGTGAGAGGGAGAGCGTGGCGGAGACGTGTT  
 TCTGACAGGGGCTCGTGT\*ACGATTGGT**CCGCACCGCTGGGCGGTTG**\* \*GCAAGCGAGGCCGCGGCTCCAGAGACCGAGGACCT  
 GGGAGGGGGCGAGCCGAAGGCTCGCGGGCGGAACAGGAGGGCTGGTCAATAATACCGCTCACGAAGCGGTGAGAGCTGCTA  
 CAGCAGGCGAGAAATGCCGAACGCTGAAGCAGCGAACACCAAAATGCTTCGGCCGCTTTGTACGGCTCCATGCTAACTCCGCTTAG  
 CCTAAATCTCGCTCCGCTCCGCTTCGCTCCGCTACGCTCAAACCAGGCTAACCGGTAATTTCAATGCACCTTTGACCTTTGACATGC  
 AAGATTCCCTTTGAAGTAACAGATCATGTGTGTACGCGTGTGTGTGATTACAGGGTGGTGGAGCGGAGGCTCTGGCCAGACTGG  
 AGGCGCGGTTCCAAGACCCCAATGGGTGGCGGGTTCAGGTGAGAGGCGAGGGCTGGGGCGGTGCACCGGTGTGTGTGTGT  
 ACGTGTGTGATGCCCGAGCCAAGCGGGCAGGTGGGGTGGCGATGTTACAACCAATGCCGTTGATGGAATGGAGTAAGCTGGCTGGA  
 CAGAGTGGACCGCGGCACTCCGCGGCAACGCTATGCAGGGTGTGTTATCGACGATGCTTTTACGATACGCCAACAATGCGA  
 AACCGAGATAGCTAGGGTGTGCCGCTGTGAGGGCCCCACGGCTGCCGTGCCAACACCCACACAGCCACCCACCCACACAG  
 AAGCCCGACAGGACCCAGCGCTGGGAGAAGCCCGGACCACTGTGTGTGCTGCCCTACCTCAAGTTCCGGCTG

Sequenced regions are depicted in black and unsequenced regions in gray. The sequence of the *APHVIII* insertion cassette within the *acry* gene is shown in italics. The *APHVIII* ORF is underlined. The cassette is inserted in the 3' → 5' direction. Two exchanged nucleotides in the *APHVIII* ORF are highlighted in bold and in a gray background. Thereby, a C was replaced by T at position 330, leading to an amino acid change from alanine to threonine. At position 486, a G was replaced by C, thus leading to a swap from histidine to aspartic acid. One asterisk shows the position of one deleted nucleotide (G). Two asterisks show the position of 11 missing nucleotides (ACGCGGGCCGC) from intron 7 of the wild-type *aCRY* gene, which have been deleted in the mutant.

**Supplemental Figure 4.** Complementation of the *acry* Mutant by Transformation with pKP39 to Generate Transgenic Line 42

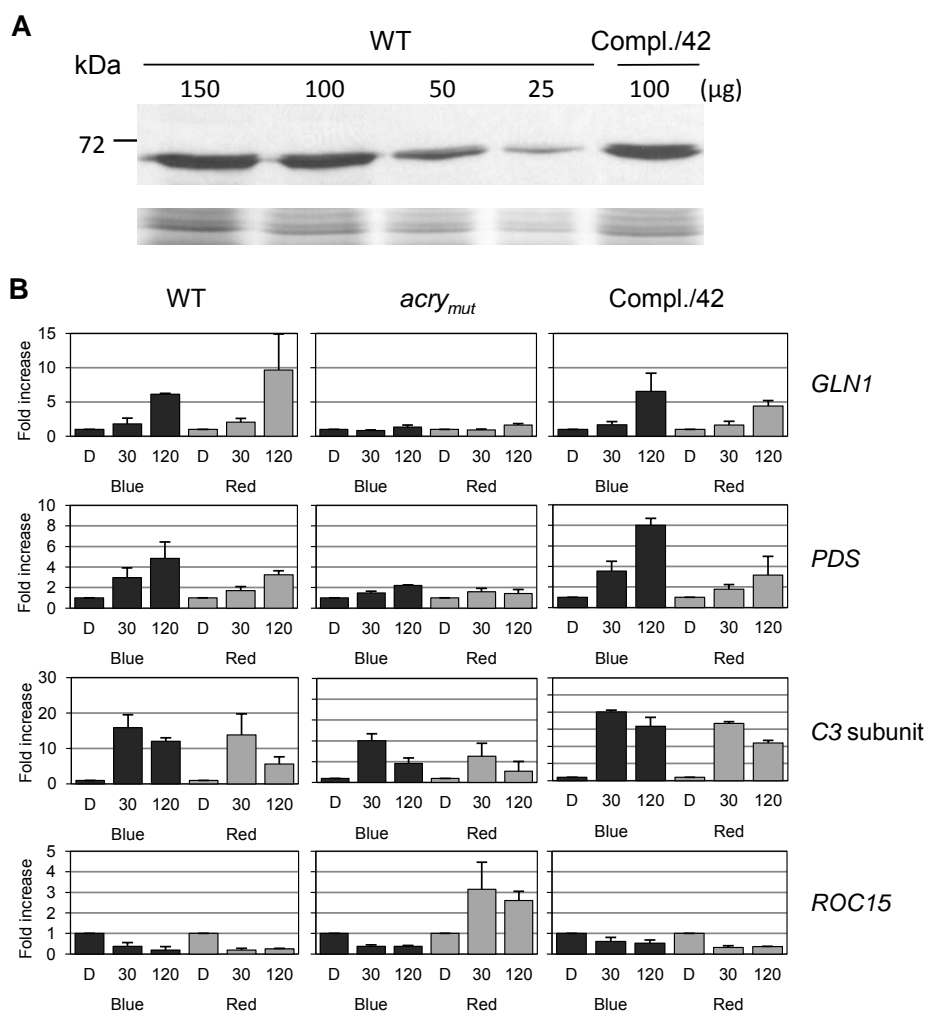

**(A)** Different amounts of protein from a crude extract of WT cells (150, 100, 50 and 25  $\mu\text{g}$  per lane) were separated by 10% SDS-PAGE along with 100  $\mu\text{g}$  of protein from a crude extract of the complemented *acry* mutant strain 42 (Compl./42). The protein samples were used for immunoblotting with anti-aCRY antibodies along with chemoluminescence detection. To control for the different amounts of protein loaded, the PVDF membrane was Coomassie blue-stained after the immunological detection. From this stain, a random band is shown (lower panel). Quantification of aCRY level was done as described in Figure 2B ( $n=3$ ).

**(B)** Cells of the Compl./42 *acry* mutant strain were grown in a light-dark cycle. At the end of the light period, they were placed in darkness (D) for 60 h before exposure to 30 min and 120 min of either blue or red light (see Methods). Total RNA was extracted and analyzed by RT-qPCR. The changes in transcript levels following exposure of the cells with blue or red light are presented as n-fold change relative to RNA from dark-grown cells. Each experiment was performed in triplicate from at least two different biological samples. Error bars show the mean and standard deviation. Data for WT and the *acry* mutant strain were taken from Figures 3 and 4.

**Supplemental Figure 5.** UV/Vis Absorption Spectra Showing the Effect of Consecutive Blue- and Red-Light Illumination on aCRY *in Vitro* in the Absence of Reductant.

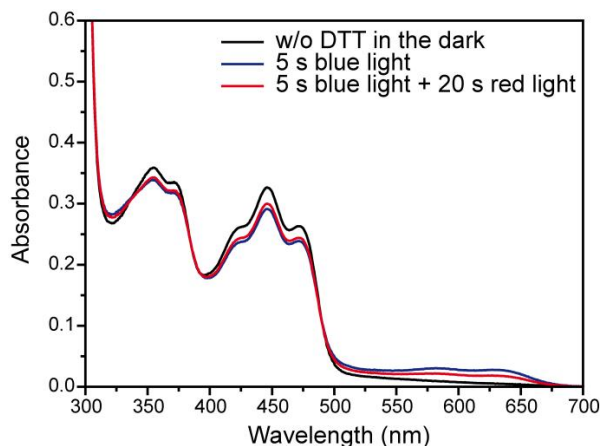

aCRY was illuminated with blue light (455 nm) for 5 s. Bands rise between 530 nm and 680 nm, which indicates the formation of the neutral radical state of the flavin chromophore. To selectively investigate the light response of the radical state, red light (636 nm) was applied for 20 s. As a consequence, the neutral radical band decreases, whereas the absorption of the oxidized state (band at 447 nm) recovers only to some extent. The loss of both the oxidized state and neutral radical state directly implies the formation of the fully reduced state of FAD by red light. Less pronounced effects are observed than in presence of DTT because of the faster thermal back reaction from the radical to the oxidized state.



**Supplemental Table 1.** LC-ESI-MS/MS Analysis of Heterologously Expressed aCRY with a C-terminal 6 x His-Tag.

| Peptide sequence            | Xcorr | z |
|-----------------------------|-------|---|
| LAAEAGVEVVTPISHTLYDTDMLVAR  | 5.73  | 3 |
| QIDWDDNPEFLAAWR             | 5.34  | 2 |
| YNFLLESLEDLQR               | 5.09  | 2 |
| YIYEPWTAPLEVQR              | 4.98  | 2 |
| GEAGGDGDDSGGEGSGGGAAAGR     | 4.66  | 2 |
| HVYPVFLDPHFLQQSSYK          | 4.49  | 3 |
| EFFYTVGSTTPNFHR             | 4.05  | 2 |
| RHPAHSQPPVSLR               | 3.87  | 3 |
| WVAGFQKPDTPSAWEKPATTVLSPYLK | 3.86  | 3 |
| LEAAFQDPK                   | 3.41  | 2 |
| NGGAAPLTMQSFTK              | 3.31  | 2 |
| GDLYVSWER                   | 3.15  | 2 |
| DYPAPIVDHAVASK              | 3.07  | 1 |
| NSIIWFR                     | 3.00  | 2 |

Heterologously expressed and purified His-tagged aCRY was digested with trypsin. Peptides were analyzed by LC-ESI-tandem MS (see Methods); z, positive charge; Xcorr, cross correlation factor. The coverage is about 37%.

**Supplemental Table 2.** Oligonucleotides Used in RT-qPCR

| Gene          | Gene ID    | Forward primer (5' - 3') | Reverse primer (5' - 3') |
|---------------|------------|--------------------------|--------------------------|
| <i>C1</i>     | jgi 182403 | GACTGGCCACAAGCGGAAAC     | ATCACGCGGCCAACCTTGTC     |
| <i>C3</i>     | jgi 99329  | CGGAGGCTGAGCTTGCCATC     | ATGTGCTGCTCCGTGGTGTG     |
| <i>CDKB1</i>  | jgi 59842  | CTCCTCTGCGTCGAGCACAC     | TTCCATGGCGGTCCATCCAC     |
| <i>CHLD</i>   | jgi 134594 | CTCTGCTGCCGCCATTGAG      | CCGAGCGCATCTTGGTCTTC     |
| <i>CK1</i>    | jgi 137286 | GGCGTTGGACATTCCGATTG     | GCCGGTCTGGATGTTTCGTTT    |
| <i>CO</i>     | jgi 159133 | GGACTGCGATGTGCGCATCC     | CGGCGTCGCACTGCAGTAG      |
| <i>GLN1</i>   | jgi 133971 | CCATCACGCGCCACTTTCTG     | TGGAGGAGCCGTCGTAGTTC     |
| <i>GLN2</i>   | jgi 129468 | AGTACATCTGGGCGGATGGC     | GCAGGATGCAGTCCGAGTTG     |
| <i>GSA</i>    | jgi 138524 | ACGCCGACTCCTTCCTGGTG     | GTTGTAGGTGGCGGTCAGGG     |
| <i>LHCBM6</i> | jgi 184490 | GCGAGGCTGTCTGGTTCAAG     | CCTCGATCAGGCCATCAGG      |
| <i>PDS</i>    | jgi 78128  | ACCTTTCGGACGCTGGACAC     | GTGCAAGCCAGTCTCGTACC     |
| <i>POR</i>    | jgi 136589 | GCGCCAAGGCTTACAAGGAC     | ACTTCTGGAAGGCGGGAAC      |
| <i>RACK1</i>  | jgi 105734 | CTTCTCGCCATGACCAC        | CCCACCAGGTTGTTCTTCAG     |
| <i>ROC15</i>  | AB363964   | GCCGGTCCAGCAACAACAAC     | GTGTGCATGCGCCAGAAGAG     |
| <i>ROC40</i>  | AB363965   | ATGAGGAGCATGCCCGATTTC    | CCTCGCCATCCTTTGTGGAC     |
| <i>ROC55</i>  | AB363966   | GTCTGGACGGCTGCTTCTTC     | GTCTGGACGGCTGCTTCTTC     |
| <i>ROC66</i>  | AB363967   | GCCGCTTGTGGGACAACACC     | ACCATGCCGAACGCGATGAG     |
| <i>ROC75</i>  | AB363968   | GGCAACGGCAACGAGAATGG     | GCCCTCCGTGCGCATCTTTGG    |
| <i>ROC114</i> | AB363970   | GCGGACACCTTGACGGTCAC     | GCGAGCAACCCAGCCATTAG     |

All JGI gene IDs were derived from the Joint Genome Institute (*Chlamydomonas reinhardtii* v4.0). The AB codes are European Molecular Biology Laboratory (EMBL) accession numbers and represent mRNAs, since there were no gene models available in these cases (Matsuo et al., 2008).

<sup>1</sup> **Pootakham, W., Gonzalez-Ballester, D., and Grossman, A.R.** (2010) Identification and regulation of plasma membrane sulfate transporters in *Chlamydomonas*. *Plant Physiol.* **153**: 1653-1668.
